# Quantifying Data Quality for Clinical Trials Using Electronic Data Capture

Meredith L. Nahm<sup>1\*</sup>, Carl F. Pieper<sup>2</sup>, Maureen M. Cunningham<sup>3</sup>

**1** Duke Translational Medicine Institute, Durham, North Carolina, United States of America, **2** Department of Biostatistics and Bioinformatics, Duke University Medical Center, Durham, North Carolina, United States of America, **3** Duke Clinical Research Institute, Durham, North Carolina, United States of America

## Abstract

**Background:** Historically, only partial assessments of data quality have been performed in clinical trials, for which the most common method of measuring database error rates has been to compare the case report form (CRF) to database entries and count discrepancies. Importantly, errors arising from medical record abstraction and transcription are rarely evaluated as part of such quality assessments. Electronic Data Capture (EDC) technology has had a further impact, as paper CRFs typically leveraged for quality measurement are not used in EDC processes.

**Methods and Principal Findings:** The National Institute on Drug Abuse Treatment Clinical Trials Network has developed, implemented, and evaluated methodology for holistically assessing data quality on EDC trials. We characterize the average source-to-database error rate (14.3 errors per 10,000 fields) for the first year of use of the new evaluation method. This error rate was significantly lower than the average of published error rates for source-to-database audits, and was similar to CRF-to-database error rates reported in the published literature. We attribute this largely to an absence of medical record abstraction on the trials we examined, and to an outpatient setting characterized by less acute patient conditions.

**Conclusions:** Historically, medical record abstraction is the most significant source of error by an order of magnitude, and should be measured and managed during the course of clinical trials. Source-to-database error rates are highly dependent on the amount of structured data collection in the clinical setting and on the complexity of the medical record, dependencies that should be considered when developing data quality benchmarks.

**Citation:** Nahm ML, Pieper CF, Cunningham MM (2008) Quantifying Data Quality for Clinical Trials Using Electronic Data Capture. PLoS ONE 3(8): e3049. doi:10.1371/journal.pone.0003049

**Editor:** Roberta W. Scherer, Johns Hopkins Bloomberg School of Public Health, United States of America

**Received:** March 5, 2008; **Accepted:** August 4, 2008; **Published:** August 25, 2008

This is an open-access article distributed under the terms of the Creative Commons Public Domain declaration which stipulates that, once placed in the public domain, this work may be freely reproduced, distributed, transmitted, modified, built upon, or otherwise used by anyone for any lawful purpose.

**Funding:** This work was supported by NIDA Contract No. HHSN271200522071C.

**Competing Interests:** The authors have declared that no competing interests exist.

\* E-mail: meredith.nahm@duke.edu

## Introduction

Research sponsors and clinical research organizations (CROs) are transitioning from paper-based data collection to electronic data capture (EDC) systems. If novel technologies are to be successfully integrated into clinical trials, their effects on data quality must be fully understood. Relatively few new data collection systems or methodologies, with the exception of electronic patient reported outcomes (ePRO) [1–12], are well-characterized with respect to data quality.

Data quality for paper-based clinical trials is traditionally assessed through audits that compare database listings against data recorded on paper case report forms (CRFs), thereby providing an estimate of the database error rate [13,14]. Audits may also indicate location and distribution of errors, which are usually categorized in a manner meaningful to the study (e.g., critical versus noncritical) or the organization (e.g., systematic versus random errors, or according to root causes) [13]. In addition to providing objective information about processes, audits can prevent future errors by identifying problematic work patterns or behaviors.

## Clinical trial data audits

There are numerous examples, both published [15–33] and unpublished, of database audits that compare database listings to

CRFs. The average error rate in the published literature for CRF-to-database audits is 14 errors per 10,000 fields. Such audits do not assess the percentage of correct data; rather, they identify additional errors introduced during data processing [14]. Other errors, including measurement error, recording error, or transcription mistakes that occur when transferring data from source documents to CRFs [34] lie outside the scope of traditional CRF-to-database audits. Thus, the commonly reported “database error rate” is merely an estimate of errors introduced during data entry and cleaning; at best equal to, but likely less than, the total “true” error rate. Determining actual data quality requires an assessment of all possible sources of error, including data measurement, recording, abstraction, transcription, entry, coding, or cleaning [13,35].

In compliance with Good Clinical Practices (GCP), trial sponsors typically perform source document verification (SDV) of recorded data [36]. SDV compares original data, such as the medical record, with the study CRF. Although the SDV process is not usually quantified during trial operations, our literature review identified 42 articles that provided source-to-database error rates, primarily from registries [37–78]; the average error rate across these publications was 976 errors per 10,000 fields. In contrast, the average error rate for published CRF-to-database comparison audits was 14 errors per 10,000 fields [15–33].

With EDC, there is no paper CRF to compare to the source, leading to differences in data collection processes and resulting data quality [79]. Although EDC proponents frequently claim that clinical trial data quality improves with use of such systems, studies supporting this contention have yet to appear in the peer-reviewed literature, and it is not clear whether traditional methods of ascertaining data quality suffice for EDC trials.

### Exploring the effects of EDC on data quality

The comparison of published source-to-database and CRF-to-database error rates suggests that most errors occur when data are transferred from source to CRF during medical record abstraction or transcription. Web-based EDC can only affect the latter, through structured data collection, valid value lists, and on-screen checks for values that are missing, out of range, or inconsistent. Possible detrimental effects of EDC have not been investigated.

We sought to explore the effects, if any, of EDC on data quality. We hypothesized that for EDC to substantially improve quality, it would have to facilitate improvements to the process of medical record abstraction. Unfortunately, abstraction error rates are not usually quantified in clinical trials. Manual SDV can detect abstraction errors, but is labor intensive and highly sensitive to the vagaries of locating the pertinent text or value in medical records, leading to variability and measurement error. Additionally, ePRO systems, in which data are directly entered by the research subject, may be difficult or even impossible to assess for data quality because the information may not be validly and reliably retrieved; however, such issues lie outside the scope of our study.

### Purpose

The National Institute on Drug Abuse (NIDA) Clinical Trials Network (CTN) has instituted a process for quantifying data quality on EDC trials. In 2005, the NIDA CTN implemented the InForm (Phase Forward, Inc.) Web-based EDC system at the data and statistical center (DSC) housed at the Duke Clinical Research Institute. The system facilitates extensive error checking for missing, out-of-range, and logically inconsistent values across the CRF in real time so that many potential errors are caught prior to final data submission.

NIDA CTN trials use structured paper data collection forms as the source (patient questionnaire data for CTN trials are captured via ePRO and are not included in our analysis). The data auditing method for EDC trials provides an objective assessment of quality at each site, including sample size calculations for audits, assessment of data quality by site and by trial, corrective action processes, and reports to communicate and monitor audit results. We present findings from our initial evaluation of the NIDA CTN data quality assessment program.

### Methods

An audit plan was applied to trials conducted at the network's DSC that opened to enrollment after April 2005 and used Web-based EDC, excluding trials that were migrated to the center. Two audits, in which source data were compared to database listings for a prespecified sample of study patients, were conducted at each research site. The first source-to-database audit at each site occurred at a point when 20%–30% of the expected subjects were enrolled. The second audit was performed at 70%–80% of expected enrollment. Our audit plan incorporated both the statistically calculated sample sizes used in industry CRF-to-database audits, and the National Cancer Institute's method of auditing cases source-to-database at each site.

Researchers have choices of powering the audit based by 1) the width of the confidence interval (CI), 2) standard error, or 3) a formal hypothesis test. We considered CI and hypothesis testing methods of sample size calculation. The first CI-based method is for comparison of an error rate to a standard. Here, a known or assumed limit, or a specified acceptance criterion (Formula 1) is compared to an observed value. The intent is to ensure that the observed value is less than some criterion; hence, a one-tailed interval. The second CI-based method (Formula 2) is the CI for the difference between two sites or times; i.e., based on the standard error of the difference. The hypothesis-based method (Formula 3) is a comparison of two error rates drawn from different samples to assess differences between sites or times (e.g., error rates between two sites or between two different time points within a site).

In the CI-based method, a one-sided CI might be used to assess the probability that the rate is lower than some prescribed level. Formula 2 would be employed to assess if a rate differed between sites or times. Assuming a 95% CI, where  $np_i > 5$ , the CI can be calculated from the following equations [80]:

$$p_i + Z_{\alpha} \sqrt{\frac{p_i(1-p_i)}{n_i}} \quad (1)$$

(one sample, one – sided CI)

$$p_i - p_j \pm Z_{\alpha/2} \sqrt{\frac{p_i(1-p_i)}{n_i} + \frac{p_j(1-p_j)}{n_j} - \frac{1}{2} \left( \frac{1}{n_i} + \frac{1}{n_j} \right)} \quad (2)$$

(difference between two sites or times, one – sided CI)

where  $Z_{\alpha}$  is 1.645 (the one-sided alpha level associated with 95% of the normal  $Z$ ), and  $p_i$  is the observed error rate in site,  $i$ , of sample size  $n_i$ . Further, in Formula 2,  $p_j$  is the error at site or time  $j$  of size  $n_j$  to be compared to some other error rate  $p_j$  with sample size  $n_j$ , and  $Z_{\alpha/2}$  is 1.96 (the two-sided alpha level associated with 95% of the normal  $Z$ ). As written, the formulas show a CI for a given  $p_i$  (and  $p_j$ ) and sample size. The required sample size can then be algebraically derived. Sample size curves for a variety of desired CI widths and expected error rates are shown in Figure 1. The sample size based on a one-sided CI for an acceptance criterion of 50 errors per 10,000 fields, underlying expected error rate of 30 errors per 10,000 fields, and a desired CI width of 20 errors per 10,000 fields, is 2100 fields. Curves for difference-based CIs (Formula 2) can be similarly derived.

A formal hypothesis test could be conducted; e.g., to test if there are differences between sites or times. The test of a difference in error rates between two sites or times requires a slightly different formula:  $p_i$  and  $p_j$  are averaged under the null hypothesis to give Formula 3:

$$Z = \frac{|p_i - p_j| - \frac{1}{2} \left( \frac{1}{n_i} + \frac{1}{n_j} \right)}{\sqrt{\bar{p}\bar{q} \left( \frac{1}{n_i} + \frac{1}{n_j} \right)}} \quad (3)$$

where  $\bar{p}$  is the average of  $p_i$  and  $p_j$   $\left( \bar{p} = \frac{n_i p_i + n_j p_j}{n_i + n_j} \right)$  and  $\bar{q} = 1 - \bar{p}$ .

The required sample size can then be algebraically derived at a given error rate and assumed difference ( $p_i$  and  $p_i - p_j$ ). This test, however, does not adjust for power, nor for multiple comparisons. As shown in Figure 2, for a set of baseline error rates and assumed differences, the sample size required to distinguish groups quickly becomes large at 80% power. For example, if the error rate is 30/

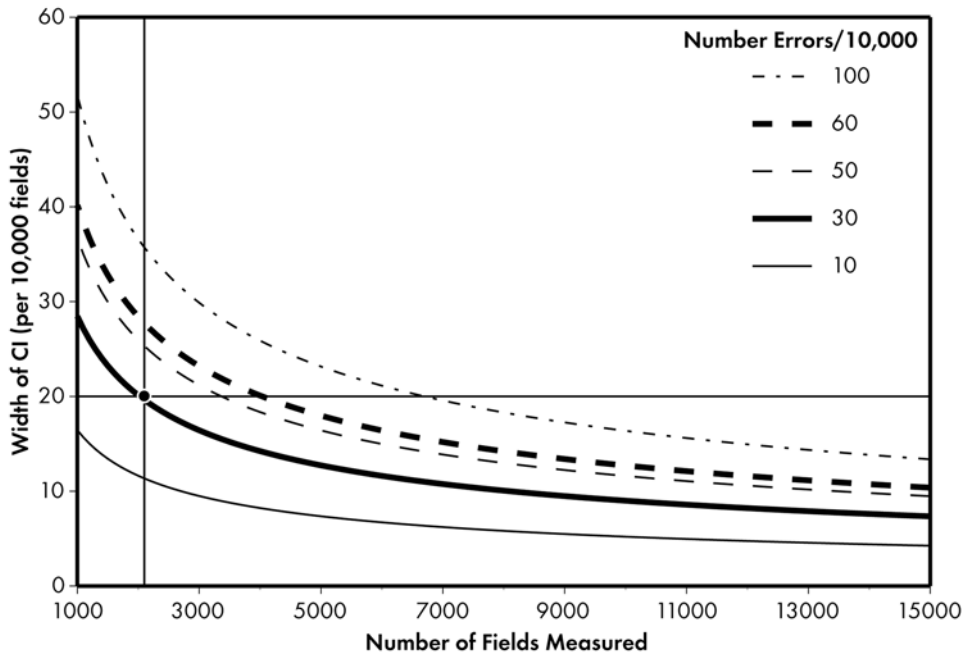

**Figure 1. Sample size curves: 95% confidence intervals (Formula 1), one-tailed.** Intersection of vertical and horizontal lines shows sample size needed to achieve a one-sided CI given an acceptance criterion of 50 errors per 10,000 data fields, an underlying expected error rate of 30 errors per 10,000 fields, and a desired CI width of 20 errors per 10,000 fields (Fleiss J, Levin BL, Paik M. *Statistical Methods for Rates and Proportions*. 3<sup>rd</sup> ed. New York, NY: Wiley; 2003). doi:10.1371/journal.pone.0003049.g001

10,000 in one site, and the error rate in the second site is triple (difference = 60), then at 80% power (and not adjusting the overall type I error rate for multiple comparisons), we would require 2900 fields per group. Where  $n_i p_i < 5$ , the normal approximation breaks

down. Since many audits have found  $n_i p_i < 5$ , and since as  $n_i p_i$  increases, exact methods approach those using the normal approximation, we employed the Clopper-Pearson exact method [81] to calculate the CIs presented in the Results section.

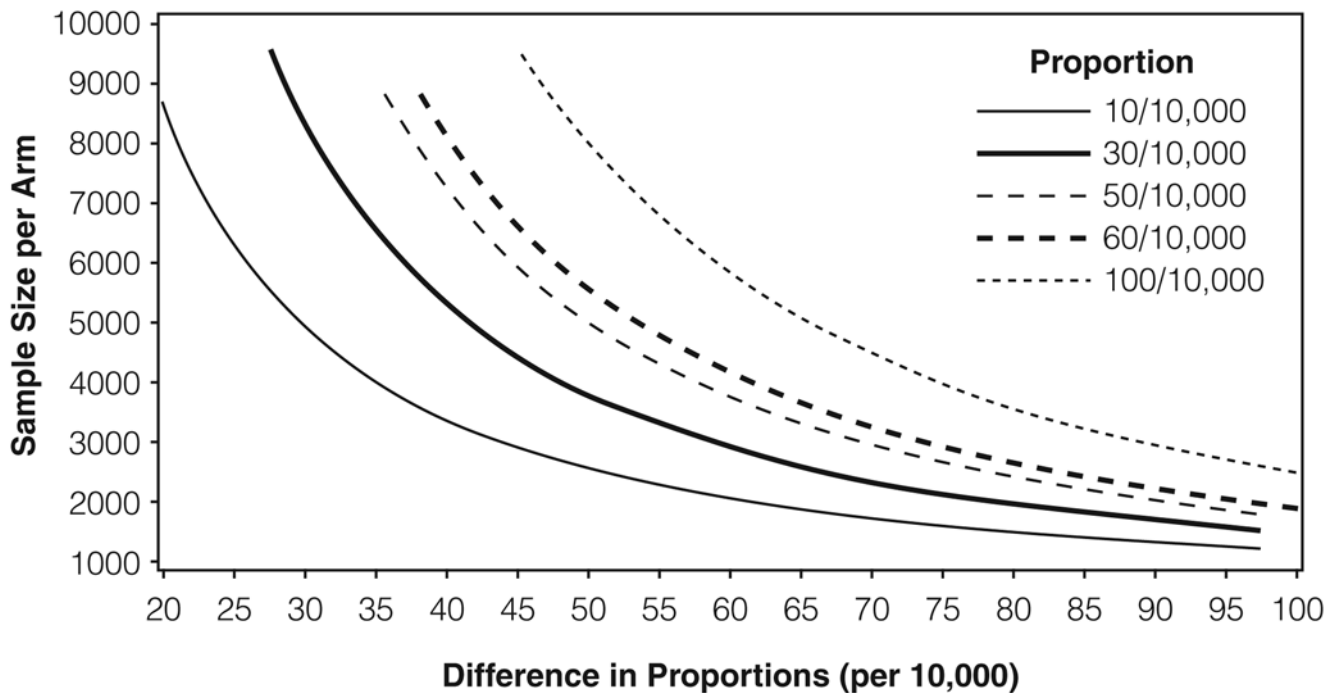

**Figure 2. Sample size curves: Hypothesis testing method (Formula 3) at 80% power and  $\alpha$  of 0.05 (two-tailed), showing sample sizes needed to distinguish among groups for given baseline error rates and assumed differences (Fleiss J, Levin BL, Paik M. *Statistical Methods for Rates and Proportions*. 3<sup>rd</sup> ed. New York, NY: Wiley; 2003).** doi:10.1371/journal.pone.0003049.g002

We sought to detect differences between sites. Given CTN site norms (i.e., outpatient setting, patients whose conditions are chronic rather than acute, and significant use of structured worksheets for source data collection), we assumed a rate of 50 errors per 10,000 fields, and wished to obtain a 20 error per 10,000 field CI, yielding a sample size of 3400 fields per site.

A sample of at least 3500 data fields, providing 100 fields coverage, was obtained by selecting random forms (a CRF page or subset of pages from a patient visit) from the list of patient forms. An additional 3500 fields were audited when approximately 70%–80% of expected enrollment was achieved, providing a statistically representative sample at each site across two time points. Any discrepancy between source and database not explained by study documentation was counted as an error. The error rate denominator was the number of fields actually audited, excluding those defined as system-calculated or propagated fields.

## Results

For our initial assessment, we completed source-to-database audits of 24 sites participating in 4 EDC trials conducted through the CTN (Figure 3). Preliminary findings show an average error rate across all 4 trials of 14.3 errors per 10,000 fields, with a 95% CI (averaged across audit CIs) of 12–39 per 10,000 fields, a low rate compared with those reported for source-to-database audits, and comparable to the average of reported CRF-to-database error rates. Fourteen percent of errors were in fields critical to the analysis (major independent or dependent variables or covariates).

Because these results, which were considerably lower than published error rates for source-to-database audits, seemed

counterintuitive, we compared them to audit results from four earlier paper-based trials managed at the DSC (Figure 4). Three trials—5, 6, and 7—used paper CRFs sent to the DSC for double data entry and cleaning. Trials 5, 6, and 7 had error rates of 3.4, 0, and 3.7 errors per 10,000 fields, respectively, as determined by CRF-to-database audits. Trial 5 used only CRF-to-database auditing at the DSC. Trials 6 and 7 were migrated to the DSC and audited both source-to-database (as part of ongoing quality control) and CRF-to-database to measure processing fidelity for migrated data. The source-to-database error rates for Trials 6 and 7 were 8.3 (5, 13) and 15.4 (13, 19) errors per 10,000 fields, respectively (Figure 4).

Trial 8 was also migrated to the DSC but employed a form of Web-based EDC in which sites completed paper CRFs and transcribed data into the EDC system. Legacy data were single-entered at the DSC from printed data listings and subjected to “CRF” (data listing)-to-database audits to assess fidelity of data processing. The error rate for this migrated data was 20.3 (7, 50) errors per 10,000 fields. The source-to-database error rate for Trial 8 was 40.5 (36, 46) errors per 10,000 fields (Figure 4). We attribute the difference between Trials 5, 6, and 7 as compared to Trial 8 to the data processing method used for the latter trial. Comparison of Figures 3 and 4 shows that the source-to-database and CRF-to-database audit results are comparable.

During this period, the DSC also performed a source-to-database audit for a trial in a different therapeutic area (epilepsy). This study, characterized by medically complex patients, an inpatient phase, and a more complex medical record, proved a useful comparator to CTN protocol trials. Data were abstracted

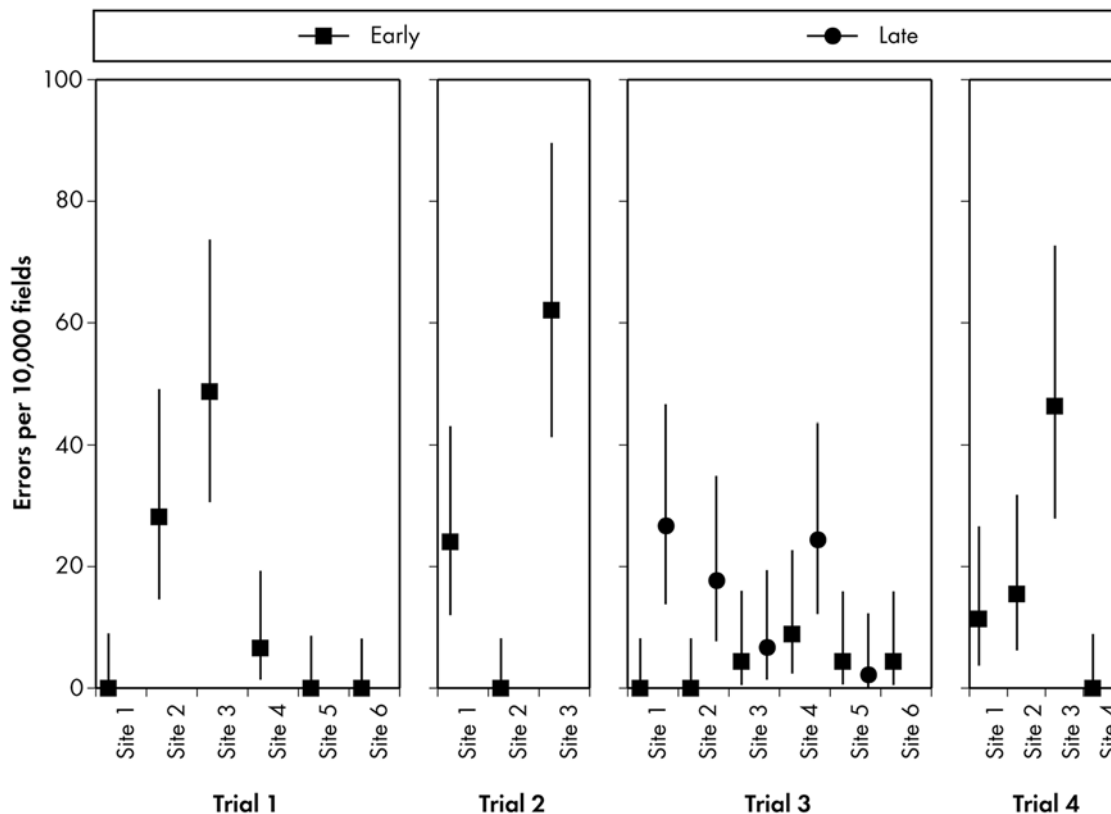

**Figure 3. Source-to-Database Audit Error Rates for CTN EDC Trials 1–4.** The first source-to-database audit (“early”) was performed when 20%–30% of expected subject enrollment was reached; the second database audit (“late”) was performed when 70%–80% of expected enrollment was reached.

doi:10.1371/journal.pone.0003049.g003

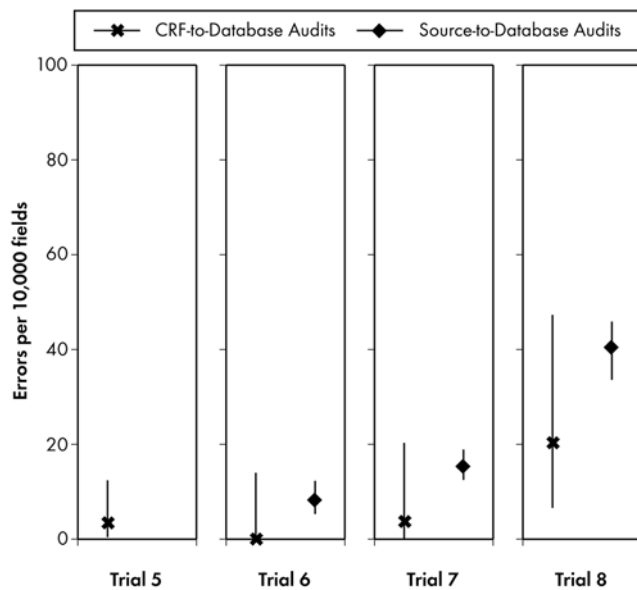

**Figure 4. Source-to-database and CRF-to-database audits for Comparator Trials 5–8.** These audits were undertaken to provide a “control” for comparison with Trials 1–4 (results displayed in Figure 3). doi:10.1371/journal.pone.0003049.g004

directly from medical records and entered. A total of 3250 data fields from five subjects were audited. We identified 139 errors, yielding an estimated error rate of 428 errors per 10,000 fields, comparable to the published literature for source-to-database audits.

## Discussion

The CTN source-to-database error rates were unexpectedly low, especially when compared to the average of 976 errors per 10,000 fields derived from published reports for source-to-database audits, and the rate of 428 errors per 10,000 fields from a recent source-to-database audit conducted at our center. The CTN source-to-database results more closely resembled CRF-to-database error rates reported in the literature and touted by industry.

One reason for these unexpected results may be the processes used to document treatment at NIDA CTN sites. CTN sites are community treatment programs for substance abuse and addiction treatment. In this setting, patient charts, largely consisting of clinic notes, tend to be brief, and confidentiality policies restrict access to research records. The CTN sites therefore separate subjects’ research and clinic records, with study visit documentation residing in the research record. Because more data typically are collected during clinical research than in standard practice, and because some programs do not clinically document treatment, worksheets provided to sites for capturing trial data often comprise the source documents. Data from these worksheets are single-entered by site staff into an EDC system with extensive on-screen checking.

In this context, our results are consistent with previous reports, with CRF-to-database error rates being lowest, followed by EDC data entered from worksheets, and finally the source-to-database error rate from therapeutic areas characterized by more acute patient conditions being highest. However, we emphasize that our findings are derived from a specialized and somewhat atypical clinical research environment; given the wide variability in the design and conduct of clinical trials, our results may not be generalizable to other research venues and should be viewed as hypothesis-generating only.

We examined variations in local monitoring by regional and community treatment centers, some of which undertake additional quality assurance. Two trials employed a central quality assurance (QA) monitor who performed SDV at all participating sites; one trial required sites to have local QA auditors to perform SDV; another neither performed central monitoring nor required sites to do so. We expected pseudo-independent central monitoring to produce higher-quality data than decentralized monitoring, and a decentralized monitoring regime to produce higher-quality data than no monitoring. However, we observed no correlation between database error rates and differences in additional local auditing or monitoring. In the clinical trials arena, source document verification (manual comparison of the medical record to the CRF or database) although unproven, is generally thought to decrease data errors. Effective SDV would be a confounding factor impacting data error rates, and should be taken into account when interpreting results.

Anticipation of an audit may be an important quality assurance mechanism, providing sites an additional incentive to maintain data quality. Based on observed error rates, one audit visit per site may be sufficient, as statistical power remains sufficient for determining the data quality of the trial as a whole as well as at each site.

Given these findings, the NIDA CTN changed its auditing plan and decreased the frequency of audits, resulting in reduced travel expenses incurred by auditors. Under the revised plan, an initial source-to-database audit would be performed for each site upon reaching 20%–30% of expected enrollment. Sites with an error rate over 50 errors per 10,000 fields would require a second audit. Most sites with error rates below this benchmark that also addressed data queries and protocol violations in a timely manner would not receive additional audits, although one site would be chosen at random for a second audit. The revised plan results in fewer logistical and financial burdens for sites, should continue to provide comprehensive data quality monitoring, and could potentially prove more cost-effective, although without accurate comparators, this assertion remains speculative. An alternative approach, in which sites would be given 24 hours to copy specified charts and send them to the data center, was considered but deemed more burdensome by the sites.

It is also worth noting that as electronic health records (EHRs) become increasingly ubiquitous, clinical researchers may adopt data collection strategies that directly access patient medical records, which would streamline the process of data collection and may significantly reduce errors associated with medical record abstraction. Such strategies, however, will face a number of hurdles, including electronic access to patient data by research staff, information retrieval, privacy concerns, and issues relating to data standardization.

## Acceptance criteria

NIDA CTN sites initially requested that an acceptance criterion be set in order to provide an objective performance standard; however, the authors felt that the introduction of such a criterion at the onset of the audit program was premature and not justified by an appropriate basis in evidence. Instead, we compared sites within a trial and performed an assessment, described here, early in the program to investigate the applicability of a CTN-wide acceptance criterion.

All random errors detected during source-to-database audits were reviewed with the site and subsequently corrected. If an error was deemed systematic (i.e., occurring across subjects or forms and due to a common cause), the characteristics and root cause were used to identify similar occurrences and apply corrections throughout the database. Error rates within a trial were also compared across sites to identify sites whose data quality differed

substantially from others'. If the error rate of source-to-database audits for a given site was outside the bounds of the 95% CI calculated over all audits on the trial, that site's data quality was deemed to differ sufficiently to warrant further investigation and intervention. In such cases, site data were further examined to elucidate the source of the errors, and corrective action was taken to bring data quality within range of other sites. We also compared error rates by trial to explore differences in data quality across trials.

Setting an acceptance criterion is unnecessary from a statistical point of view, given that 95% CIs could be used. Two possibilities then arise: 1) if any site's error rate is above the upper bound of the overall CI (aggregated across all sites, calculated from the total number of audited fields across all sites and the total number of errors across all sites for a trial), the error rate may be considered excessive, or 2) if any site's CI exceeds the upper bound of the overall CI, the site's error rate would be considered excessive. However, such rules may fail to produce operationally meaningful results; e.g., differences between sites might be so small as to have no effect on conclusions drawn from the trial, if all sites had relatively low error rates and consistently narrow CIs. Such methods might also promote a competitive or even punitive environment.

A useful acceptance criterion, then, would distinguish operationally meaningful differences. Now that we understand the process capability of the CTN, naming an acceptance criterion would also: 1) provide sites with objective performance benchmarks, allowing sites to alter internal quality systems accordingly; 2) allow statisticians to assess its appropriateness for that particular trial; and 3) provide a common language for trial-specific needs to be communicated to sites.

The consistency of data from three of the 4 trials implies that a "network-wide" acceptance criterion could be set. CTN sites were able to meet our relatively arbitrary limit of 50 errors or fewer per 10,000 fields; there was no indication that this limit was excessive. Even though we measured source-to-database processes, it is reassuring that this limit is within industry expectations for CRF-to-database processes. A recent data quality survey conducted by the Society for Clinical Data Management reported the most popular overall database error rate acceptance criteria to be 50 errors per 10,000 fields and 10 errors per 10,000 fields. The most popular acceptance criteria for critical variables were 10 errors per 10,000 fields and zero errors per 10,000 fields [34]. The question of "how many errors is too many?" is difficult to answer because it depends on many factors, including what variables are in error, the robustness of the analysis, and the concern that a single data error may cast doubt on the validity of the rest of the data [82]. Thus, arbitrary (and low) acceptance criteria tend to be employed.

We opted not to re-audit sites whose upper CIs exceeded our established limit, thereby accepting the level of risk implicit within the CI. However, in a situation in which many CTN sites were participating in multiple trials, if a particular site consistently appeared close to the limit of the acceptance criterion, those findings could be addressed as a trend. During the initial program, one trial had a significantly higher error rate than the others. A single site was identified as the cause of the high error rate; that site also had a significantly higher rate of protocol violations, and suffered most frequently from computer-related problems.

## References

1. Jonasson G, Carlsen KH, Sodal A, Jonasson C, Mowinckel P (1999) Patient compliance in a clinical trial with inhaled budesonide in children with mild asthma. *Eur Respir J* 14: 150–154.
2. Milgrom H, Bender B, Ackerson L, Bowry P, Smith B, et al. (1996) Noncompliance and treatment failure in children with asthma. *J Allergy Clin Immunol* 98: 1051–1057.
3. Spector SL, Kinsman R, Mawhinney H, Siegel SC, Rachelefsky GS, et al. (1986) Compliance of patients with asthma with an experimental aerosolized medication: implications for controlled clinical trials. *J Allergy Clin Immunol* 77: 65–70.
4. Straka RJ, Fish JT, Benson SR, Suh JT (1997) Patient self-reporting of compliance does not correspond with electronic monitoring: an evaluation using isosorbide dinitrate as a model drug. *Pharmacotherapy* 17: 126–132.

Operationally, the initial 3500-field sample size allowed for a half day on site, but the requirement to complete the audit at 20%–30% of enrollment at each site did not permit trips to be combined. The benchmark of 20% enrollment was selected to ensure that sufficient data were available for source-to-database audits, but that the amount would be too large for sites to "scrub" the first few cases. Conducting audits sufficiently early for sites to benefit from using results to prevent future problems and to allow sufficient time for remediation were also significant considerations, as such instant feedback appeared to promote more effective site management.

## Limitations

Our results are limited to a single therapeutic area and are drawn from a setting that may not be generalizable to other arenas. Our results, however, may not be extrapolable to inexperienced research sites, or to therapeutic areas that require significant amounts of medical record abstraction, or to industry trials that lack CTN research infrastructure. Further, these results are based on our experience with a single commercial EDC system; use of a different system, or variations in implementation of the same system, might have a significant impact on data quality, and methods for calculating error rates vary widely across the industry [13,34].

Important questions remain to be answered, however; for example, the impact of data cleaning and auditing on trial results remains unclear. In addition, a model does not yet exist for error distributions in clinical trial data. In the absence of such a model, event independence is assumed (e.g., in our sample size calculations).

## Conclusions

Our evaluation provides additional evidence that medical record abstraction and transcription are the steps most likely to introduce error into data collection and management processes, and that source-to-database error rates may vary depending on therapeutic area and according to site data practices. Data centers should be aware of these factors, and provide assistance to sites in reducing variability in the abstraction process. We also found that the capacity to compare data at the level of individual sites facilitated evaluation and allowed us to demonstrate the degree of consistency among sites. Finally, we observed that higher error rates may correlate with other operational problems. We believe that objectively quantifying data quality will provide a more comprehensive picture of a site's performance.

## Acknowledgments

This authors wish to thank Jonathan McCall for editorial assistance with this manuscript.

## Author Contributions

Conceived and designed the experiments: MLN CFP. Performed the experiments: CFP. Analyzed the data: MLN CFP. Wrote the paper: MLN CFP MMC.

5. Verschelden P, Cartier A, L'Archeveque J, Trudeau C, Malo JL (1996) Compliance with and accuracy of daily self-assessment of peak expiratory flows (PEF) in asthmatic subjects over a three month period. *Eur Respir J* 9: 880–885.
6. Chmelik F, Doughty A (1994) Objective measurements of compliance in asthma treatment. *Ann Allergy* 73: 527–532.
7. Simmons MS, Nides MA, Rand CS, Wise RA, Tashkin DP (2000) Unpredictability of deception in compliance with physician-prescribed bronchodilator inhaler use in a clinical trial. *Chest* 118: 290–295.
8. Mazze RS, Shamoon H, Pasmantier R, Lucido D, Murphy J, et al. (1984) Reliability of blood glucose monitoring by patients with diabetes mellitus. *Am J Med* 77: 211–217.
9. Williams ML, Freeman RC, Bowen AM, Zhao Z, Elwood WN, et al. (2000) A comparison of the reliability of self-reported drug use and sexual behaviors using computer-assisted versus face-to-face interviewing. *AIDS Educ Prev* 12: 199–213.
10. Newman JC, Des Jarlais DC, Turner CF, Gribble J, Cooley P, et al. (2002) The differential effects of face-to-face and computer interview modes. *Am J Public Health* 92: 294–297.
11. Turner CF, Ku L, Rogers SM, Lindberg LD, Pleck JH, et al. (1998) Adolescent sexual behavior, drug use, and violence: increased reporting with computer survey technology. *Science* 280: 867–873.
12. Metzger DS, Koblin B, Turner C, Navaline H, Valenti F, et al. (2000) Randomized controlled trial of audio computer-assisted self-interviewing: utility and acceptability in longitudinal studies. HIVNET Vaccine Preparedness Study Protocol Team. *Am J Epidemiol* 152: 99–106.
13. Good Clinical Data Management Practices (version 4.0). Society for Clinical Data Management. Available at: <http://www.scdm.org/>. Accessed August 8, 2006.
14. Blumenstein BA (1993) Verifying keyed medical research data. *Stat Med* 12: 1535–1542.
15. Bagniewska A, Black D, Molvig K, Fox C, Ireland C, et al. (1986) Data quality in a distributed data processing system: the SHEP Pilot Study. *Control Clin Trials* 7: 27–37.
16. Caloto T, Multicentre Project for Tuberculosis Research Study Group (2001) Quality control and data-handling in multicentre studies: the case of the Multicentre Project for Tuberculosis Research. *BMC Med Res Methodol* 1: 14.
17. Crombie IK, Irving JM (1986) An investigation of data entry methods with a personal computer. *Comput Biomed Res* 19: 543–550.
18. DuChene AG, Hultgren DH, Neaton JD, Grambsch PV, Broste SK, et al. (1986) Forms control and error detection procedures used at the Coordinating Center of the Multiple Risk Factor Intervention Trial (MRFIT). *Control Clin Trials* 7: 34S–45S.
19. Goldhill DR, Sumner A (1998) APACHE II, data accuracy and outcome prediction. *Anaesthesia* 53: 937–943.
20. Jorgensen CK, Karlsmose B (1998) Validation of automated forms processing. A comparison of Teleform with manual data entry. *Comput Biol Med* 28: 659–667.
21. Kawado M, Hinotsu S, Matsuyama Y, Yamaguchi T, Hashimoto S, et al. (2003) A comparison of error detection rates between the reading aloud method and the double data entry method. *Control Clin Trials* 24: 560–569.
22. Kronmal RA, Davis K, Fisher LD, Jones RA, Gillespie MJ (1978) Data management for a large collaborative clinical trial (CASS: Coronary Artery Surgery Study). *Comput Biomed Res* 11: 553–566.
23. Lancaster S, Hallstrom A, McBride R, Morris M (1995) A comparison of key data entry versus fax data entry, accuracy and time [abstract]. *Control Clin Trials* 16(Suppl 1): 75–76.
24. McEntegart DJ, Jadhav SP, Brown T, Channon EJ (1999) Checks of case record forms versus the database for efficacy variables when validation programs exist. *Drug Inform J* 33: 101–107.
25. Neaton JD, Duchene AG, Svendsen KH, Wentworth D (1990) An examination of the efficiency of some quality assurance methods commonly employed in clinical trials. *Stat Med* 9: 115–123.
26. Norton SL, Buchanan AV, Rossmann DL, Chakraborty R, Weiss KM (1981) Data entry errors in an on-line operation. *Comput Biomed Res* 14: 179–198.
27. O'Rourke MK, Fernandez LM, Bittel CN, Sherrill JL, Blackwell TS, et al. (1999) Mass data massage: an automated data processing system used for NHEXAS, Arizona. National Human Exposure Assessment Survey. *J Expo Anal Environ Epidemiol* 9: 471–484.
28. Prud'homme GJ, Canner PL, Cutler JA (1989) Quality assurance and monitoring in the Hypertension Prevention Trial. Hypertension Prevention Trial Research Group. *Control Clin Trials* 10: 84S–94S.
29. Reynolds-Haertle RA, McBride R (1992) Single vs. double data entry in CAST. *Control Clin Trials* 13: 487–494.
30. Rostami R. Society for Clinical Data Management (Fall 2004). Available from SCDM at [www.scdm.org](http://www.scdm.org).
31. Stone EJ, Osganian SK, McKinlay SM, Wu MC, Webber LS, et al. (1996) Operational design and quality control in the CATCH multicenter Trial. *Prev Med* 25: 384–399.
32. Quan KH, Vignano A, Fainsinger RL (2003) Evaluation of a data collection tool (TELEform) for palliative care research. *J Palliat Med* 6: 401–408.
33. Velikova G, Wright EP, Smith AB, Cull A, Gould A, et al. (1999) Automated collection of quality-of-life data: a comparison of paper and computer touch-screen questionnaires. *J Clin Oncol* 17: 998–1007.
34. Nahm M, Dziem G, Fendt K, Freeman L, Masi J, et al. (2004) Data quality survey results. *Data Basics* 10: 13–19.
35. Gad SC, Taulbee SM (1996) Handbook of data recording, maintenance, and management for the biomedical sciences. Boca Raton FL: CRC Press.
36. U.S. Food and Drug Administration Web site. Guidance for industry. E6 good clinical practice: Consolidated guidance (April 1996). Available at: <http://www.fda.gov/cder/guidance/959fnl.pdf> (accessed July 16, 2007).
37. Adams WG, Conners WP, Mann AM, Palfrey S (2000) Immunization entry at the point of service improves quality, saves time, and is well-accepted. *Pediatrics* 106: 489–492.
38. Arts D, de Keizer N, Scheffer GJ, de Jonge E (2002) Quality of data collected for severity of illness scores in the Dutch National Intensive Care Evaluation (NICE) registry. *Intensive Care Med* 28: 656–659.
39. Arts DG, De Keizer NF, Scheffer GJ (2002) Defining and improving data quality in medical registries: a literature review, case study, and generic framework. *J Am Med Inform Assoc* 9: 600–611.
40. Arts DG, Bosman RJ, de Jonge E, Joore JC, de Keizer NF (2003) Training in data definitions improves quality of intensive care data. *Crit Care* 7: 179–184.
41. Christian MC, McCabe MS, Korn EL, Abrams JS, Kaplan RS, et al. (1995) The National Cancer Institute audit of the National Surgical Adjuvant Breast and Bowel Project Protocol B-06. *N Engl J Med* 333: 1469–1474.
42. Clive RE, Ocwieja KM, Kamell L, Hoyler SS, Seiffert JE, et al. (1995) A national quality improvement effort: cancer registry data. *J Surg Oncol* 58: 155–161.
43. Cousley RR, Roberts-Harry D (2000) An audit of the Yorkshire Regional Cleft Database. *J Orthod* 27: 319–322.
44. Cress RD, Zaslavsky AM, West DW, Wolf RE, Felter MC, et al. (2003) Completeness of information on adjuvant therapies for colorectal cancer in population-based cancer registries. *Med Care* 41: 1006–1012.
45. Håkansson I, Lundström M, Stenevi U, Ehinger B (2001) Data reliability and structure in the Swedish National Cataract Register. *Acta Ophthalmol Scand* 79: 518–523.
46. Dreisler E, Schou L, Adamsen S (2001) Completeness and accuracy of voluntary reporting to a national case registry of laparoscopic cholecystectomy. *Int J Qual Health Care* 13: 51–55.
47. Favalli G, Vermorken JB, Vantongelen K, Renard J, Van Oosterom AT, et al. (2000) Quality control in multicentric clinical trials. An experience of the EORTC Gynecological Cancer Cooperative Group. *Eur J Cancer* 36: 1125–1133.
48. Fortmann SP, Haskell WL, Williams PT, Varady AN, Hulley SB, et al. (1986) Community surveillance of cardiovascular diseases in the Stanford Five-City Project. Methods and initial experience. *Am J Epidemiol* 123: 656–669.
49. Ghali WA, Rothwell DM, Quan H, Brant R, Tu JV (2000) A Canadian comparison of data sources for coronary artery bypass surgery outcome “report cards”. *Am Heart J* 140: 402–408.
50. Gibbs JL, Monro JL, Cunningham D, Rickards A, Society of Cardiothoracic Surgeons of Great Britain and Northern Ireland, Paediatric Cardiac Association, Alder Hey Hospital (2004) Survival after surgery or therapeutic catheterisation for congenital heart disease in children in the United Kingdom: analysis of the central cardiac audit database for 2000–1. *BMJ* 328: 611.
51. Gissler M, Teperi J, Hemminki E, Meriläinen J (1995) Data quality after restructuring a national medical registry. *Scand J Soc Med* 23: 75–80.
52. Goldhill DR, Sumner A (1998) APACHE II, data accuracy and outcome prediction. *Anaesthesia* 53: 937–943.
53. Herbert MA, Prince SL, Williams JL, Magee MJ, Mack MJ (2004) Are unaudited records from an outcomes registry database accurate? *Ann Thorac Surg* 77: 1960–1964.
54. Horbar JD, Leahy KA (1995) An assessment of data quality in the Vermont-Oxford Trials Network database. *Control Clin Trials* 16: 51–61.
55. Hunt JP, Cherr GS, Hunter C, Wright MJ, Wang YZ, et al. (2000) Accuracy of administrative data in trauma: splenic injuries as an example. *J Trauma* 49: 679–686.
56. Jenders RA, Dasgupta B, Mercedes D, Fries F, Stambaugh K (1999) Use of a hospital practice management system to provide initial data for a pediatric immunization registry. *Proc AMIA Symp*. pp 286–290.
57. Kantonen I, Lepantalo M, Salenius JP, Forsström E, Hakkarainen T, et al. (1997) Auditing a nationwide vascular registry—the 4-year Finnvasc experience. *Finnvasc Study Group. Eur J Vasc Endovasc Surg* 14: 468–474.
58. Karam V, Gunson B, Roggen F, Grande L, Wannoff W, et al. (2003) Quality control of the European Liver Transplant Registry: results of audit visits to the contributing centers. *Transplantation* 75: 2167–2173.
59. Knatterud GL, Rockhold FW, George SL, Barton FB, Davis CE, et al. (1998) Guidelines for quality assurance in multicenter trials: a position paper. *Control Clin Trials* 19: 477–493.
60. Lin CM, Lee PC, Teng SW, Lu TH, Mao IF, et al. (2004) Validation of the Taiwan Birth Registry using obstetric records. *J Formos Med Assoc* 103: 297–301.
61. Linblad U, Råstam L, Ranstam J, Peterson M (1993) Validity of register data on acute myocardial infarction and acute stroke: The Skaraborg Hypertension Project. *Scand J Soc Med* 21: 3–9.
62. Lovison G, Bellini P (1989) Study on the accuracy of official recording of nosological codes in an Italian regional hospital registry. *Methods Inf Med* 28: 142–147.

63. Lorenzoni L, Da Cas R, Aparo UL (1999) The quality of abstracting medical information from the medical record: the impact of training programmes. *Int J Qual Health Care* 11: 209–213.
64. Lowel H, Lewis M, Hormann A, Keil U (1991) Case finding, data quality aspects and comparability of myocardial infarction registers: results of a south German register study. *J Clin Epidemiol* 44: 249–260.
65. McGovern PG, Pankow JS, Burke GL, Shahar E, Sprafka JM, et al. (1993) Trends in survival of hospitalized stroke patients between 1970 and 1985. *The Minnesota Heart Survey*. *Stroke* 24: 1640–1648.
66. McKinlay SM, Carleton RA, McKenney JL, Assaf AR (1989) A new approach to surveillance for acute myocardial infarction: reproducibility and cost efficiency. *Int J Epidemiol* 18: 67–75.
67. Moro ML, Morsillo F (2004) Can hospital discharge diagnoses be used for surveillance of surgical-site infections? *J Hosp Infect* 56: 239–241.
68. Nagtegaal ID, Kranenburg EK, Hermans J, van de Velde CJ, van Krieken JH (2000) Pathology data in the central databases of multicenter randomized trials need to be based on pathology reports and controlled by trained quality managers. *J Clin Oncol* 18: 1771–1779.
69. Rawson NS, Robson DL (2000) Concordance on the recording of cancer in the Saskatchewan Cancer Agency Registry, hospital charts and death registrations. *Can J Public Health* 91: 390–393.
70. Steward WP, Vantongelen K, Verweij J, Thomas D, Van Oosterom AT (1993) Chemotherapy administration and data collection in an EORTC collaborative group—can we trust the results? *Eur J Cancer* 29A: 943–947.
71. Tennis P, Bombardier C, Malcolm E, Downey W (1993) Validity of rheumatoid arthritis diagnoses listed in the Saskatchewan Hospital Separations Database. *J Clin Epidemiol* 46: 675–683.
72. Teperi J (1993) Multi method approach to the assessment of data quality in the Finnish Medical Birth Registry. *J Epidemiol Community Health* 47: 242–247.
73. Tingulstad S, Halvorsen T, Norstein J, Hagen B, Skjeldestad FE (2002) Completeness and accuracy of registration of ovarian cancer in the cancer registry of Norway. *Int J Cancer* 98: 907–911.
74. van der Putten E, van der Velden JW, Siers A, Hamersma EA (1987) A pilot study on the quality of data management in a cancer clinical trial. *Control Clin Trials* 8: 96–100.
75. Vantongelen K, Rotmensz N, van der Schueren E (1989) Quality control of validity of data collected in clinical trials. EORTC Study Group on Data Management (SGDM). *Eur J Cancer Clin Oncol* 25: 1241–1247.
76. Volk T, Hahn L, Hayden R, Abel J, Puterman ML, Tyers, et al. (1997) Reliability audit of a regional cardiac surgery registry. *J Thorac Cardiovasc Surg* 114: 903–910.
77. Wynn A, Wise M, Wright MJ, Rafaat A, Wang YZ, et al. (2001) Accuracy of administrative and trauma registry databases. *J Trauma* 51: 464–468.
78. Wang FL, Gabos S, Sibbald B, Lowry RB (2001) Completeness and accuracy of the birth registry data on congenital anomalies in Alberta, Canada. *Chronic Dis Can* 22: 57–66.
79. Helms RW (2001) Data quality issues in electronic data capture. *Drug Inform J* 35: 827–837.
80. Fleiss J, Levin BL, Paik M (2003) *Statistical Methods for Rates and Proportions*. 3rd ed. New York, NY: Wiley.
81. Janes ET (1976) Confidence Intervals vs. Bayesian Intervals. In: Harper WL, Hooker CA, eds. *Foundations of Probability Theory, Statistical Inference, and Statistical Theories of Science*. Vol 6: D. Reidel.
82. Davis JR, Nolan VP, Woodcock J, Estabrook RW, eds (1999) *Assuring Data Quality and Validity in Clinical Trials for Regulatory Decision Making*. Workshop Report. Roundtable on Research and Development of Drugs, Biologics, and Medical Devices, Division of Health Sciences Policy, Institute of Medicine. Washington DC: National Academy Press.
